1 **Effects of face masks and ventilation on the risk of SARS-CoV-2 respiratory**  
2 **transmission in public toilets: a quantitative microbial risk assessment**

3

4 Thammanitchpol Denpetkul<sup>1</sup>, Oranoot Sittipunsakda<sup>1</sup>, Monchai Pumkaew<sup>2</sup>, Skorn Mongkolsuk<sup>3,4</sup>,  
5 and Kwanrawee Sirikanachana<sup>3,4,\*</sup>

6

7 <sup>1</sup>Faculty of Tropical Medicine, Mahidol University, Bangkok, Thailand 10400; <sup>2</sup>Environmental  
8 Engineering and Disaster Management Program, School of Multidisciplinary, Mahidol University,  
9 Kanchanaburi Campus, Sai Yok, Kanchanaburi, Thailand, 71150; <sup>3</sup>Research Laboratory of  
10 Biotechnology, Chulabhorn Research Institute, Bangkok, Thailand 10210; <sup>4</sup>Center of Excellence on  
11 Environmental Health and Toxicology (EHT), Ministry of Education, Bangkok, Thailand 10400

12 [\\*kwanrawee@cri.or.th](mailto:*kwanrawee@cri.or.th)

13

14 Short title: toilet user risks to COVID-19 infection via inhalation

15

16 **Highlights**

- 17 - The use of public toilets poses a risk of SARS-CoV-2 respiratory transmission  
18 - Highest risks generated in the order of sneezing, coughing, and breathing  
19 - No gender differences in risk by counteracting dwell times and inhalation rates  
20 - Ventilation did not reduce risk even at 20 ACH, beyond the WHO-recommended value  
21 - N95 and surgical masks offer the most effective risk mitigation to toilet users

22

23 **Graphical abstract**

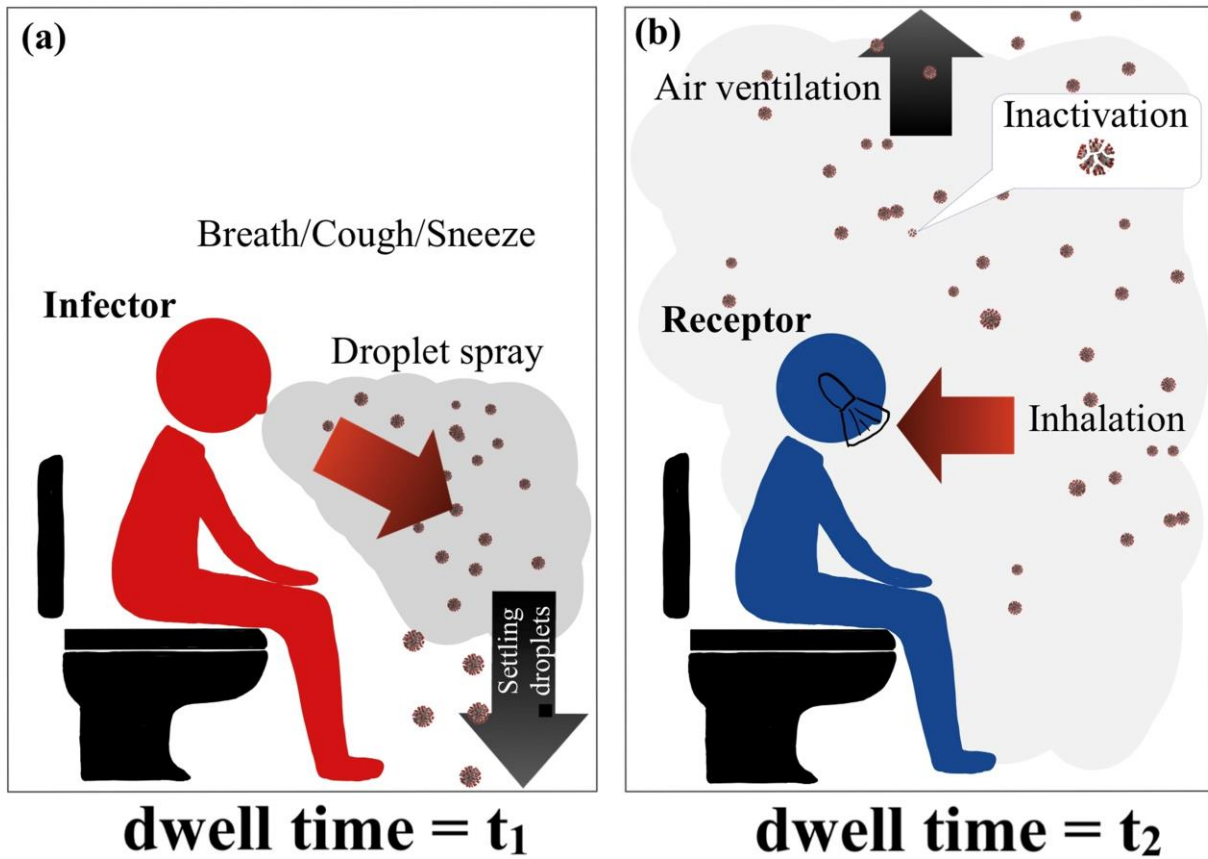

24

25

26 **Abstract**

27 Public toilets could increase the risk of COVID-19 infection via airborne transmission; however,  
28 related research is limited. We aimed to estimate SARS-CoV-2 infection risk through respiratory  
29 transmission using a quantitative microbial risk assessment framework by retrieving SARS-CoV-  
30 2 concentrations from the swab tests of 251 Thai patients. Three virus-generating scenarios were  
31 investigated: an infector breathing, breathing with a cough, and breathing with a sneeze. Infection  
32 risk (97.5th percentile) was as high as  $10^{-3}$  with breathing and increased to  $10^{-1}$  with a cough or  
33 sneeze, thus all higher than the risk benchmark of  $5 \times 10^{-5}$  per event. No significant gender  
34 differences for toilet users (receptors) were noted. The highest risk scenario of breathing and a

35 sneeze was further evaluated for risk mitigation measures. Risk mitigation to lower than the  
36 benchmark succeeded only when the infector and receptor simultaneously wore an N95 respirator  
37 or surgical mask and when the receptor wore an N95 respirator and the infector wore a denim  
38 fabric mask. Ventilation up to 20 air changes per hour (ACH), beyond the 12-ACH suggested by  
39 the WHO, did not mitigate risk. Virus concentration, volume of expelled droplets, and receptor  
40 dwell time were identified as the main contributors to transmission risk.

41

42 **Keywords:** aerosol, COVID-19, mask, restroom, risk management, ventilation

43

#### 44 **Introduction**

45 The coronavirus disease 2019 (COVID-19) pandemic has affected the global population since its  
46 first emergence in December 2019. The three main transmission routes of the severe acute  
47 respiratory syndrome coronavirus 2 (SARS-CoV-2), an etiological agent of COVID-19, have been  
48 identified as (1) the inhalation of respiratory fluids carrying infectious viruses, (2) direct splashes  
49 or sprays of infectious respiratory droplets and aerosol particles, and (3) the touching of  
50 contaminated surfaces (Centers for Disease Control and Prevention, 2021). Communal confined  
51 spaces such as public toilets in shopping centers, schools, restaurants, airports, theaters, and  
52 hospitals may be significant areas for SARS-CoV-2 transmission (Dancer, Li, et al., 2021). Surface  
53 contamination with SARS-CoV-2 in toilets and bathrooms has been reported (Ding, Qian, et al.,  
54 2021; Maestre, Jarma, et al., 2021); however, transmission risks from fomite exposure could be  
55 reduced significantly through the simple yet effective interventions of hand washing, hand  
56 sanitizing, and surface disinfection (Dancer et al., 2021; World Health Organization [WHO],  
57 2020a; Pitol & Julian, 2021). Airborne transmission, on the other hand, is deemed the main route

58 of COVID-19 spread (Centers for Disease Control and Prevention, 2021) and could be aggravated  
59 by the use of busy, confined public toilet spaces, especially if appropriate steps are not taken to  
60 mitigate the risk of virus transmission (Dancer, Li, et al., 2021).

61

62 The positive detection of SARS-CoV-2 RNA has been reported in 23.8% of air samples from  
63 hospital toilets, which have demonstrated higher viral loads than clinical areas (Birgand, Peiffer-  
64 Smadja, et al., 2020). However, risk assessments of respiratory exposure to SARS-CoV-2 in public  
65 toilets is limited. Potential sources of infectious respiratory droplets and aerosol particles in toilet  
66 settings include exhalation and expelling, such as sneezing, speaking, and coughing, by infected  
67 toilet users, and the aerosolization of infected feces and urine after toilet flushing (Dancer, Li, et  
68 al., 2021; Schijven, Vermeulen, et al., 2021). Although infectious SARS-CoV-2 was isolated from  
69 the feces of a severely infected patient (Xiao, Sun, et al., 2020), studies confirming that feces and  
70 urine in wastewater remain infectious for SARS-CoV-2 are limited, with supporting evidence  
71 showing poor virus survival in gastrointestinal tracts due to the low pH of gastric fluids, bile,  
72 digestive enzymes, and bacterial byproducts (Zang, Castro, et al., 2020; Albert, Ruíz, et al., 2021;  
73 Jones, Baluja, et al., 2020). Consequently, even though flushing activities can produce airborne  
74 droplets and aerosols, the associated risks may be low because contamination by infectious virus  
75 particles is less likely (Shi, Huang, et al., 2021). In this study, we therefore focused on  
76 characterizing the risk of SARS-CoV-2 respiratory transmission introduced by normal breathing  
77 and expelling (i.e., coughing and sneezing) in a public toilet setting.

78

79 Quantitative microbial risk assessment (QMRA) is a valuable tool used to quantitatively estimate  
80 human health risks associated with exposure to pathogens in different environmental matrices

81 (Rose and Gerba, 1991; Haas, Rose, et al., 2014). The QMRA framework has been applied to  
82 estimate SARS-CoV-2 transmission risk to wastewater treatment plant workers (Dada and  
83 Gyawali, 2021; Zaneti, Girardi, et al., 2021), Tokyo 2020 Olympic Games attendees (Murakami,  
84 Miura, et al., 2021), and confined vehicle passengers and shared room users (Schijven, Vermeulen,  
85 et al., 2021). In the present study, we aimed to estimate the risk of infection associated with public  
86 toilet exposure to SARS-CoV-2 through airborne transmission using the QMRA approach. For  
87 convenience, we called a healthy person who is exposed to transmission risk a receptor, while a  
88 disease-carrying person, either symptomatic or asymptomatic, was termed an infector. We  
89 gathered the input parameters from a variety of sources. These included COVID-19 concentration  
90 data obtained by swab testing 251 Thai patients from a public hospital in Bangkok and the exposure  
91 factors related to three droplet- and aerosol-generating activities of infectors, namely, breathing,  
92 breathing with a cough, and breathing with a sneeze, which were all identified from published  
93 sources (Schijven, Vermeulen, et al., 2021; Fabian, Brain, et al., 2011; Duguid, 1946; Han, Weng,  
94 et al., 2013; Loudon and Roberts, 1967). The risk of infection was calculated separately for male  
95 and female receptors because of their different respiratory rates and periods of time spent in the  
96 toilet, the so-called dwell times. To include uncertainty and variability in the risk characterization,  
97 we applied the Monte Carlo simulation technique to calculate the risks. The sensitivity of the model  
98 parameters was evaluated to determine which input parameters could help reduce the associated  
99 uncertainty. Finally, two risk mitigation measures, namely, face mask wearing and ventilation  
100 improvement, were assessed to ascertain their efficacy. The calculated risks and associated  
101 mitigation measures may be beneficial in the development of public health policies aimed at  
102 providing effective control of SARS-CoV-2 transmission.

103

## 104 **MATERIALS AND METHODS**

### 105 **Risk scenarios**

106 We evaluated the infection risk in various scenarios with and without preventive measures. For  
107 the public toilet model, a Thailand standard cubicle size of  $1.5 \times 0.8 \times 2.7$  m ( $3.24 \text{ m}^3$ ) was set for  
108 the risk evaluation (Ministry of Public Health, 2016). The three scenarios used in this study that  
109 can cause an infector to generate infectious droplets and aerosols included breathing (Br),  
110 breathing with a cough (Br+Co), and breathing with a sneeze (Br+Sn). The scenario that provided  
111 the highest risk was further investigated to determine the efficacy of the identified mitigation  
112 measures (i.e., face mask wearing and ventilation). To evaluate the effects of mask wearing,  
113 different types of masks (i.e., N95 respirator and surgical and denim fabric masks) were modeled  
114 when worn by either an infector or a receptor, or both. For the ventilation evaluation, the air  
115 changes per hour (ACH) were varied at 0 (no ventilation), 0.5 (poor ventilation), 10 (DIN 1946  
116 ventilation standard for public toilets), 12 (WHO recommended standard ventilation [2021]), and  
117 20 (extreme ventilation). An outline of the QMRA steps for all the scenarios are presented in  
118 Figure 1.

119

### 120 **Virus levels generated by an infector**

121 The SARS-CoV-2 concentrations used in this study were retrieved from the reverse-transcription  
122 quantitative polymerase chain reaction quantification cycle ( $C_t$ ) values of 251 positive swab test  
123 results of an N2 gene from a public hospital in Bangkok from March to May 2021. Due to the  
124 absence of a standard curve for clinical swab testing in Thailand, the viral concentrations were  
125 estimated using a published standard curve (Sherchan, Shahin, et al., 2020), which ranged from  
126  $4.4 \times 10^{-1}$  to  $6.4 \times 10^8$  gene copies (gc)/ $\mu\text{L}$ . The SARS-CoV-2 concentrations ( $A$ ) were fitted with

127 a triangular distribution as shown in Table S1. To convert the virus concentrations from gc to an  
128 infectious plaque-forming unit (PFU), the ratios of the PFU/gc ( $R$ ) of SARS-CoV-2 between 1:100  
129 and 1:1000 with a uniform distribution were applied (Pitol & Julian, 2021).

130

131 The number of infectious viruses suspended in the ambient air of the toilet cubicle was calculated  
132 using the mass balance equation (Eq. 1) in which each term in the equation has units of mass per  
133 time. Under the completely mixed condition, the accumulation of virus particles as aerosols was  
134 obtained from the summation of the breathing of an infector, virus inactivation, and virus removal  
135 by mechanical ventilation and inhalation. Under typical conditions of 20%–70% relative humidity,  
136 a 20°C temperature, and no direct sunlight, an average SARS-CoV-2 inactivation rate of 0.008  
137 ( $\text{min}^{-1}$ ) was applied (Schuit, Ratnesar-Shumate, et al., 2020). We assumed that the virus particles  
138 were released continually during the time the infector spent in the toilet cubicle (infector's dwell  
139 time =  $t_I$  minutes). The dwell times for men and women, which were in line with those indicated  
140 in an airport study (250 men and 237 women), were fitted with a log-normal distribution (Table  
141 S1) (Gwynne, Hunt, et al., 2019). The remaining infectious virus concentrations generated by the  
142 infector after leaving the toilet ( $C_{tI}$ ) were calculated according to Eq. 2 by integrating Eq. 1 with  
143 no initial virus particles ( $C = 0$ ). The inhalation rates ( $q_{in}$ ) following the uniform distribution ranged  
144 between 8.36 and 19.74 L/min for men and 6.4 and 13.78 L/min for women (Brochu, Ducré-  
145 Robitaille, et al., 2006). The additional concentrations of infectious SARS-CoV-2 expelled by  
146 coughing ( $C_{co}$ ) and sneezing ( $C_{sn}$ ) were calculated using Eqs. 3 and 4, respectively. The volumetric  
147 flow of droplets from an infector's exhalation ( $q_{br}$ ) ranged from  $5 \times 10^{-9}$  to  $6 \times 10^{-6}$   $\mu\text{L}/\text{min}$   
148 (Schijven, Vermeulen, et al., 2021). In addition, the volume of aerosol droplets expelled per cough  
149 ( $V_{co}$ ) and per sneeze ( $V_{sn}$ ) was set according to the literature (Schijven, Vermeulen, et al., 2021).

150 However, the size of the droplets played an important role in their activity. The larger droplets  
 151 deposited quickly, whereas the smaller droplets (aerosols) could remain suspended in the air for a  
 152 longer period. Thus, the volumetric ratios of aerosols to total droplets expelled ( $F$ ) were considered  
 153 using a droplet size  $\leq 70 \mu\text{m}$  based on the size distribution of droplets in the literature for breathing  
 154 (Fabian, Brain, et al., 2011), coughing (Duguid, 1946; Han, Weng, et al., 2013; Loudon and  
 155 Roberts, 1967) and sneezing (Duguid, 1946; Han, Weng, et al., 2013) (Table S1).

$$156 \quad \langle \text{Accumulation within system} \rangle = \langle \text{Flow in through system boundary} \rangle - \langle \text{Flow out through system boundary} \rangle - \langle \text{Reaction within system} \rangle \quad \text{Eq. 1.1}$$

$$157 \quad V \frac{dC}{dt} = q_{br} A R - \mu V C - q_{vent} C - q_{in} C \quad \text{Eq. 1.2}$$

$$158 \quad C_{t1} = \frac{q_{br} A R}{(\mu V + q_{vent} + q_{br})} \left( 1 - e^{-\frac{\mu V + q_{vent} + q_{in}}{V} t_1} \right) \quad \text{Eq. 2}$$

$$159 \quad C_{co} = \frac{A V_{co} R F}{V} \quad \text{Eq. 3}$$

$$160 \quad C_{sn} = \frac{A V_{sn} R F}{V} \quad \text{Eq. 4}$$

161 where the parameters related to virus generation by an infector are:

162  $q_{br}$  = volumetric flow of droplets from an infector's exhalation ( $\mu\text{L-droplet}/\text{min}$ )

163  $A$  = virus concentrations in the genome copies per volume of droplets ( $\text{gc}/\mu\text{L-droplet}$ )

164  $C_{co}$  = additional infectious virus concentrations in the air caused by a cough ( $\text{PFU}/\text{L}$ )

165  $C_{sn}$  = additional infectious virus concentrations in the air caused by a sneeze ( $\text{PFU}/\text{L}$ )

166  $R$  =  $\text{PFU}/\text{gc}$  ratio

167  $F$  = fraction of aerosol volume per total volume of droplets expelled (dimensionless)

168  $V_{co}$  = volume of aerosol expelled per cough ( $\mu\text{L}/\text{cough}$ )

169  $V_{sn}$  = volume of aerosol expelled per sneeze ( $\mu\text{L}/\text{sneeze}$ )



170  $q_{in}$  = inhalation rate (L/min)

171  $q_{vent}$  = ventilation rate (L/min) that equals  $ACH \times V/60$

172  $V$  = volume of air in a cubicle (3,240 L-air)

173  $t_I$  = infector's dwell time (min)

174  $\mu$  = inactivation rate in the air at 20%–70% relative humidity levels ( $\text{min}^{-1}$ )

175

### 176 **Virus levels accessible to a receptor**

177 Because no input source of virus (no infector) was present, the term of flow in through a system  
 178 boundary was discarded. To solve Eq. 5, the infectious virus concentrations the receptor ( $C_{t2}$ ) was  
 179 exposed to during the receptor's dwell time  $t_2$  were calculated from Eq. 6. In this study, we  
 180 assumed that after the infector exited the cubicle, the receptor immediately entered the cubicle.  
 181 The initial concentrations ( $C_0$ ) based on three scenarios (i.e., breathing only, breathing with a  
 182 cough, and breathing with a sneeze [Eqs. 7–9]) were therefore incorporated into Eq. 6.

183

*No source*

184  $\langle \text{Accumulation within system} \rangle = \langle \text{Flow in through system boundary} \rangle - \langle \text{Flow out through system boundary} \rangle - \langle \text{Reaction within system} \rangle$  Eq. 5.1

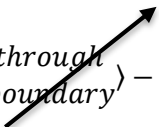

185  $V \frac{dC}{dt} = -\mu V C - q_{vent} C - q_{in} C$  Eq. 5.2

186  $C_{t2} = C_0 \left( e^{-\frac{\mu V + q_{vent} + q_{in}}{V} t_2} \right)$  Eq. 6

187 Given  $C_0$  based on the following specific scenarios:

188 Breathing only:  $C_0 = C_{tI}$  Eq. 7

189 Breathing with a cough:  $C_0 = C_{tI} + C_{co}$  Eq. 8

190 Breathing with a sneeze:  $C_0 = C_{tI} + C_{sn}$  Eq. 9

191

## 192 **Virus doses inhaled by the receptor**

193 The virus doses ( $d$ ) that would be inhaled by a receptor were calculated by incorporating the  
194 inhalation rate ( $q_{in}$ ) with a definite integral of the infectious virus concentration-time function ( $C_{t2}$ ).  
195 The limits of integration were set from  $t = 0$  to the receptor's dwell time ( $t_2$ ) (Eqs. 10.1–10.2). The  
196 initial concentrations ( $C_0$ ) also followed Eqs. 7–9 in line with the desired scenarios.

$$197 \quad d = q_{in} \int_{t=0}^{t=t_2} C_{t2} dt \quad \text{Eq. 10.1}$$

$$198 \quad d = \left( \frac{q_{in} V C_0}{\mu V + q_{vent} + q_{in}} \right) \left( 1 - e^{-\frac{\mu V + q_{vent} + q_{in}}{V} t_2} \right) \quad \text{Eq. 10.2}$$

199

200 where  $t_2$  = receptor's dwell time (min), and  $d$  = SARS-CoV-2 infectious dose (PFU).

201

## 202 **SARS-CoV-2 dose-response models**

203 The risk assessment was conducted by following the QMRA framework. Given the lack of dose-  
204 response information for SARS-CoV-2, the SARS-CoV data sets (Watanabe, Bartrand, et al.,  
205 2010) that had been utilized in various SARS-CoV-2 QMRA studies (Murakami, Miura, et al.,  
206 2021; Dada and Gyawali, 2021; Zaneti, Girardi, et al., 2021; Cortellessa, Stabile, et al., 2021) were  
207 applied. The risk of infection followed the exponential model (Eq. 11):

$$208 \quad P_{event} = 1 - e^{-\left(\frac{d}{k}\right)} \quad \text{Eq. 11}$$

209 where  $P_{event}$  is the probability of infection per event (probability), and  $k$  is the optimal dose  
210 response function value of  $4.1 \times 10^2$ , which is equivalent to the chance that a single pathogen  
211 would initiate an infection response (Watanabe, Bartrand, et al., 2010).

212

### 213 **Risk characterization and sensitivity analysis**

214 To estimate the  $P_{event}$  for a receptor exposed to SARS-CoV-2, the data from the previous steps  
215 were integrated into Monte Carlo simulations (MCs) with 10,000 iterations for each condition  
216 using Oracle Crystal Ball software version 11.1.2.4.850. MCs is a randomization technique that  
217 uses repeated random sampling from distributions given to key input variables in a model,  
218 including corresponding uncertainty profiles. The risk of infection was displayed in the 2.5th  
219 percentile, mean, and 97.5th percentile using a forest plot in GraphPad Prism version 7.0. It is  
220 becoming increasingly important to fully consider the uncertainties, including those in the 97.5th  
221 percentile, to maintain a sufficient safety margin for decision-making during the COVID-19  
222 pandemic (Zhang, Ji, et al., 2021). The estimated risk was compared to a benchmark of 1 infection  
223 per 20,000 exposed people per event ( $5 \times 10^{-5}$ ) (Murakami, Miura, et al., 2021). A sensitivity  
224 analysis was also conducted to determine the effects of the input variables on the risk calculation.

225

### 226 **Risk management evaluation**

227 Two risk mitigation interventions were investigated: face mask wearing and ventilation. The  
228 universal wearing of face masks has been recommended as a low-cost and efficient means of  
229 mitigating virus transmission (WHO, 2020b). Among the different types of face masks,  
230 predominantly N95 respirator and surgical and fabric masks are used worldwide. Viral filtration  
231 efficiency (VFE) characterized using a bacteriophage MS2 following the ASTM F2101-14  
232 standard testing method has revealed 99.8%–100% VFE for N95 respirators, 99.3%–99.8% VFE  
233 for surgical masks, and 54.8%–92.1% for denim fabric masks (Whiley, Keerthirathne, et al., 2020)

234 (Table S1). MS2 bacteriophages were selected as the model microbes because they are two to three  
235 times smaller in size than SARS-COV-2 (70–90 nm in diameter).

236

237 Ventilation is also an important element used to control indoor air quality in public toilets.  
238 Depending on the applicable regulatory building standard, either the installation of a mechanical  
239 ventilation system or the use of natural ventilation may be necessary. The effect of air change rates  
240 on SARS-CoV-2 transmission risk was considered in this study. The DIN 1946 ventilation  
241 standard is generally applied in public toilets. For the pandemic, the WHO has also suggested that  
242 ventilation in indoor spaces with aerosol-generating potential should be greater than or equal to 12  
243 ACH (WHO, 2021). In this study, five air change rates were tested: 0 ACH (no ventilation), 0.5  
244 ACH (poor ventilation), 10 ACH (DIN 1946 ventilation standard for public toilets), 12 ACH  
245 (WHO-recommended standard ventilation), and 20 ACH (extreme ventilation) (Table S1).

246

## 247 **RESULTS AND DISCUSSION**

### 248 **Infection risk from respiratory transmission in public toilets**

249 The risk of infection from SARS-CoV-2 transmission through three respiratory exposure  
250 scenarios, namely, breathing, breathing with a cough, and breathing with a sneeze, were  
251 characterized in this study. The probability of infection per event was not found to be significantly  
252 different between men and women ( $p > 0.05$ ; Mann–Whitney  $U$  test) across all scenarios (Figure  
253 2 and Table S2). Although men usually have a higher breathing rate (Brochu et al., 2006), which  
254 results in greater exposure to viruses, men spend on average around 22% less time in toilets than  
255 women (Gwynne, Hunt, et al., 2019), leading to a reduced risk of virus transmission. When a  
256 receptor without a protective mask was in an unventilated public toilet, the infection risk (97.5th

257 percentile) was  $9.87 \times 10^{-4}$  for men and  $1.17 \times 10^{-3}$  for women in the infector breathing scenario.  
258 Interestingly, the risk values increased sharply when additional viral loads were expelled into the  
259 air by an infector either sneezing or coughing (Figure 2 and Table S2). Coughing and sneezing can  
260 produce saliva droplets of various sizes (Duguid, 1946; Han, Weng, et al., 2013; Loudon and  
261 Roberts, 1967) and thus generate infectious virus-containing aerosols in public toilet facilities. For  
262 breathing with a cough, the 97.5th percentile of risk was  $2.17 \times 10^{-1}$  for men and  $2.15 \times 10^{-1}$  for  
263 women. Similarly, sneezing increased the risk of infection to  $3.66 \times 10^{-1}$  and  $3.67 \times 10^{-1}$  for men  
264 and women, respectively. All the scenarios demonstrated higher risks than the  $5 \times 10^{-5}$  benchmark  
265 value (Murakami, Miura, et al., 2021). We therefore showed that receptors had a high risk of  
266 infection when using an unventilated public toilet without wearing a protective mask.

267

## 268 **Risk mitigation: face mask wearing**

### 269 *Face mask wearing in either an infector or a receptor*

270 Because it delivered the highest risk, the scenario with an infector breathing with a sneeze was  
271 selected to further evaluate the effectiveness of face mask wearing to reduce infection risk in a  
272 receptor. The probabilities of infection per event for different mask types are shown in Figure 3  
273 and Table S3. All types of face masks considerably reduced the risk of infection. For example, an  
274 N95 respirator could lead to an approximately 2-log reduction when worn by an infector and a 3-  
275 log reduction when worn by a receptor. Interestingly, mask wearing by a receptor reduced the risk  
276 of transmission to lower levels than when a mask was worn by an infector. However, the results  
277 indicated that face mask wearing either by an infector or a receptor could still not decrease the risk  
278 to below the suggested  $5 \times 10^{-5}$  benchmark. A high risk of virus transmission in confined spaces  
279 like public toilets is therefore still possible even if an N95 respirator or surgical mask is worn. This

280 could be because the risk of infection is associated with several factors, including a high  
281 concentration of virus aerosols in the ambient air due to insufficient ventilation, the long dwell  
282 times of toilet users, the low inactivation rate of SAR-CoV-2, and the inadequate efficiency of  
283 protective masks (Stabile, Pacitto, et al., 2021; Gwynne, Hunt, et al., 2019; Schuit, Ratnesar-  
284 Shumate, et al., 2020; Whiley, Keerthirathne, et al., 2020). We also observed an at least 90% (1-  
285 log) reduction in risk when an infector wore a denim fabric mask.

286

### 287 ***Face mask wearing in both an infector and a receptor***

288 In a scenario with an infector breathing with a sneeze, the infection risk could be further reduced  
289 if both the infector and receptor wear masks (Table S3). The receptor's gender did not affect the  
290 receptor's risk much in any of the conditions. The risks to a female receptor are illustrated in Figure  
291 4. When a receptor wore an N95 respirator, the 97.5th percentile infection risk was reduced to  
292 below the  $5 \times 10^{-5}$  benchmark no matter the type of mask, whether an N95 respirator or a surgical  
293 or denim fabric mask, worn by the infector. When a receptor wore a surgical mask, the risk was  
294 also reduced to below the benchmark with the exception of the case where the infector wore a  
295 fabric mask. Denim fabric masks, on the other hand, may not provide sufficient protection even  
296 when worn by both the infector and receptor. This study supports the recommendation for a person,  
297 as a receptor, to use a surgical mask or an N95 respirator as personal protective equipment to  
298 minimize the associated risk of infection in unventilated public toilets and potentially in other  
299 confined communal spaces. In general, wearing a mask was shown to be one of the most low-cost,  
300 simple yet effective intervention measures to minimize transmission risk, which is consistent with  
301 reports from other studies (Asadi, Cappa, et al., 2020; Chu, Akl, et al., 2020; WHO, 2020b; Cheng,  
302 Cheng, et al., 2021; Goyal, Reeves, et al., 2021).

303

304 **Risk mitigation: ventilation**

305 *Single measure: ventilation*

306 The effects of ventilation (0–20 ACH) were characterized for three virus-generating scenarios:  
307 infector breathing, breathing with a cough, and breathing with a sneeze (Table S4). The breathing  
308 with a sneeze scenario delivered the highest risk, and this worst-case condition was therefore  
309 further assessed to determine the effects of ventilation using a representative female receptor  
310 (Figure 5). The results showed that increasing ACH did not significantly mitigate the risk of  
311 COVID-19 infection in the public toilet setting. Even at the 12 ACH suggested by the WHO (2021)  
312 and the extreme condition of 20 ACH, the 97.5th percentile probabilities of infection per event for  
313 the female receptor were still at the levels of  $2.52 \times 10^{-1}$  and  $2.10 \times 10^{-1}$ , respectively. Although a  
314 high ventilation rate has been suggested as a way to reduce the number of virus-containing droplets  
315 and aerosols in the air (WHO, 2021; Li, Qian, et al., 2021; Morawska, Tang, et al., 2020; Stabile,  
316 Pacitto, et al., 2021), the continuous expelling of the SARS-CoV-2 virus from breathing and/or  
317 sneezing by an infector without a mask appeared to be a significant cause of virus aerosol  
318 accumulation in ambient air. This study demonstrated that indoor ventilation alone cannot  
319 effectively reduce SARS-CoV-2 transmission risk in a public toilet setting and is less effective in  
320 risk reduction than face mask wearing. Another study similarly found that masks could reduce the  
321 infection risk caused by the Middle Eastern respiratory syndrome coronavirus in an indoor hospital  
322 setting better than ventilation (Adhikari, Chabrelie, et al., 2019).

323

324 *Double measure: ventilation and face mask wearing*

325 The additional measure of mask wearing was further investigated for its combined effectiveness  
326 in mitigating SARS-CoV-2 transmission risk when used simultaneously with increased  
327 ventilation. In the virus-generating scenario with an infector breathing with a sneeze, mask wearing  
328 by both the infector and receptor was assessed using ventilation of 10, 12, and 20 ACH (Figure 6).  
329 When compared with no ACH (Figure 4), ventilation across all ACH values did not reduce the  
330 infection risk to below the benchmark in any of the following four cases: denim fabric mask  
331 wearing by the receptor and all three types of masks worn separately by the infector, and surgical  
332 mask wearing by the receptor and denim fabric mask wearing by the infector. Consequently, we  
333 reiterate that ventilation did not impact the risk mitigation for SARS-CoV-2 transmission in a  
334 public toilet setting, especially in confined toilet cubicle conditions. Face mask wearing should  
335 therefore be promoted as a normal practice when entering public indoor spaces.

336

### 337 **Sensitivity analysis of input parameters**

338 A sensitivity analysis of the QMRA was conducted to identify the input variables that most  
339 contributed to the risk estimation. For all three transmission scenarios, namely, an infector  
340 breathing (Br), breathing with a cough (Br+Co), and breathing with a sneeze (Br+Sn), the  
341 concentration of SARS-CoV-2 virus in  $gc/\mu L$  droplets (saliva and mucus) was the most sensitive  
342 parameter, accounting for 34.3%–42.9% of the uncertainty in the probability of infection  
343 transmission to either male or female receptors (Figure 7 and Table S5). The second and third most  
344 sensitive parameters were the infector's expelled volume and the receptor's dwell time,  
345 respectively. Since breathing with a sneeze was the highest virus-generating risk scenario, a  
346 sensitivity analysis was performed in which both the infector and receptor wore masks (Table S6).  
347 Virus concentrations in  $gc/\mu L$ , sneeze volume, and the receptor's dwell time were the three



348 parameters that most influenced infection risk. Since controlling for virus concentrations and an  
349 infector's expelled volume are a challenge, particularly among asymptomatic patients, individuals  
350 should avoid spending prolonged time in closed indoor settings (Dancer, Li, et al., 2021; Stabile,  
351 Pacitto, et al., 2021).

352

### 353 **Limitations of this study and future perspectives**

354 While this study evaluated the risk of SARS-CoV-2 transmission according to the QMRA  
355 framework, its limitations and uncertainties should be carefully acknowledged. SARS-CoV-2  
356 concentrations in gc/ $\mu$ L, the most sensitive parameter affecting the calculation of risk, are subject  
357 to natural variations in the saliva and mucus of infected patients (Azzi, Carcano, et al., 2020;  
358 Wölfel, Corman, et al., 2020). In this study, 251 swab test  $C_t$  values were used to represent the  
359 virus levels in Thai patients. Due to the lack of a standard curve from Thai hospital laboratories,  
360 we used a published standard curve of the N2 gene (Sherchan, Shahin, et al., 2020) to estimate the  
361 virus concentrations in this study. However, heterogeneity in published standard curves for SARS-  
362 CoV-2 has been observed (Bivins, Kaya, et al., 2021). Moreover, variations in technical and  
363 laboratory analyses (e.g., data analysis methods and control materials) could intensify biases,  
364 leading to variability in the calculated virus concentrations (Bivins, Kaya, et al., 2021; Kongprajug,  
365 Chyerochana, et al., 2020). Adhering to standards and quality control measures is therefore  
366 underlined in order to support data sharing and referencing for future research, especially for  
367 emerging infectious diseases. However, even with consideration of the uncertainties mentioned  
368 above, the calculated virus concentrations in mucus used in this study, which ranged from  $4.4 \times$   
369  $10^{-1}$  to  $6.4 \times 10^8$  gc/ $\mu$ L, were in agreement with those from another report (Schijven, Vermeulen,  
370 et al., 2021).

371  
372 We chose to evaluate three virus-generating scenarios: an inceptor breathing, breathing with a  
373 cough, and breathing with a sneeze. However, infectors may sneeze and/or cough more than once  
374 depending on the individuals' symptoms. Coughing is the predominant symptom in COVID-19  
375 (Wang, Yang, et al., 2020), rendering coughing potentially more important than sneezing.  
376 Nevertheless, some studies have suggested that airborne transmission of infectious diseases is  
377 possible without coughing or sneezing and simply from exhaled breath from individuals who show  
378 barely any symptoms (Asadi, Bouvier, et al., 2020). In addition, the lack of dose-response  
379 information and risk of infection benchmarks for SARS-CoV-2 poses a challenge when evaluating  
380 its infection risk. We assumed that the dose-response of SARS-CoV-2 was similar to that indicated  
381 in the SARS-CoV data (Watanabe, Bartrand, et al., 2010), which has been utilized in various  
382 QMRA studies of SARS-CoV-2 (Murakami, Miura, et al., 2021; Dada and Gyawali, 2021; Zaneti,  
383 Girardi, et al., 2021; Cortellessa, Stabile, et al., 2021). With the recent emergence of various  
384 SARS-CoV-2 variants, much remains unknown regarding the behavior and characteristics of this  
385 virus. This study used the available inactivation coefficients of SARS-CoV-2 at 20°C (Schuit,  
386 Ratnesar-Shumate, et al., 2020), which could have overestimated the calculated risks in Thailand  
387 given its average daily temperature of 27.48°C (Denpetkul & Phosri, 2021).

388  
389 Furthermore, the scope of this study excluded the risk of SARS-CoV-2 respiratory transmission  
390 potentially produced by toilet flushing, as well as other transmission risks (e.g., direct splashing  
391 and surface transmission). By integrating all the known risk sources, comprehensive knowledge  
392 regarding risk estimation could be achieved to accurately inform public health policy and further  
393 help reduce transmission risk. It is apparent that research related to SARS-CoV-2 is continuing,

394 and additional data will greatly benefit future studies aiming to better understand its characteristics.  
395 The QMRA-based risk models developed in this study could facilitate future risk assessments  
396 through modifications for particular risk scenarios and the updating of the input parameters based  
397 on newly available data. Such improved risk models will be crucial tools in assessing the impact  
398 of different risk mitigation strategies during the COVID-19 and future pandemics.

399

## 400 **CONCLUSIONS**

401 Indoor public toilet facilities could be hubs of virus transmission during the COVID-19 pandemic.  
402 This study investigated the risk of airborne transmission of SARS-CoV-2 in public toilets for three  
403 virus-generating scenarios: an infector breathing, breathing with a cough, and breathing with a  
404 sneeze. The risk analysis, which followed the QMRA framework, revealed that the highest risk  
405 was when an asymptomatic or symptomatic infector sneezed. Both genders were found to be  
406 exposed to similar risks. Toilet ventilation systems cannot effectively mitigate transmission risk,  
407 so an effective intervention would be for public toilet users to wear either surgical masks or N95  
408 respirators.

409

## 410 **Conflict of interest**

411 The authors declare that they have no conflict of interest in this work.

412

## 413 **Acknowledgments**

414 This work was financially supported by the Chulabhorn Research Institute (grant no. 312/3057)  
415 and the Mahidol University. The authors would like to acknowledge Associate Professor

416 Pornsawan Leungwutiwong from the Department of Microbiology and Immunology, Faculty of  
417 Tropical Medicine, Mahidol University for providing the COVID-19 Ct values from swab testing.

418

## 419 **Supplementary Material**

420 Supplementary material for this manuscript is available.

421

## 422 **References**

423 Adhikari, U., Chabrelie, A., Weir, M., Boehnke, K., McKenzie, E., Ikner, L., Wang, M., Wang, Q., Young,  
424 K., Haas, C. N., Rose, J., and Mitchell, J. (2019) A Case Study Evaluating the Risk of Infection from  
425 Middle Eastern Respiratory Syndrome Coronavirus (MERS-CoV) in a Hospital Setting Through  
426 Bioaerosols. *Risk Analysis*, **39**(12), 2608–2624.

427 Albert, S., Ruíz, A., Pemán, J., Salavert, M., and Domingo-Calap, P. (2021) Lack of evidence for infectious  
428 SARS - CoV - 2 in feces and sewage. *European Journal of Clinical Microbiology & Infectious  
429 Diseases*, (0123456789), 2–4. [online] <https://doi.org/10.1007/s10096-021-04304-4>.

430 Asadi, S., Bouvier, N., Wexler, A. S., and Ristenpart, W. D. (2020) The coronavirus pandemic and aerosols:  
431 Does COVID-19 transmit via expiratory particles? *Aerosol Science and Technology*, **54**(6), 635–638.

432 Asadi, S., Cappa, C. D., Barreda, S., Wexler, A. S., Bouvier, N. M., and Ristenpart, W. D. (2020) Efficacy  
433 of masks and face coverings in controlling outward aerosol particle emission from expiratory  
434 activities. *Scientific reports*, **10**(1), 15665. [online] <http://www.ncbi.nlm.nih.gov/pubmed/32973285>.

435 Azzi, L., Carcano, G., Gianfagna, F., Grossi, P., Gasperina, D. D., Genoni, A., Fasano, M., Sessa, F.,  
436 Tettamanti, L., Carinci, F., Maurino, V., Rossi, A., Tagliabue, A., and Baj, A. (2020) Saliva is a  
437 reliable tool to detect SARS-CoV-2. *Journal of Infection*, **81**(1), e45–e50. [online]  
438 <https://doi.org/10.1016/j.jinf.2020.04.005>.

439 Birgand, G., Peiffer-Smadja, N., Fournier, S., Kerneis, S., Lescure, F. X., and Lucet, J. C. (2020)  
440 Assessment of Air Contamination by SARS-CoV-2 in Hospital Settings. *JAMA Network Open*, **3**(12),

- 441 1–14.
- 442 Bivins, A., Kaya, D., Bibby, K., Simpson, S. L., Bustin, S. A., Shanks, O. C., and Ahmed, W. (2021)
- 443 Variability in RT-qPCR assay parameters indicates unreliable SARS- CoV-2 RNA quantification for
- 444 wastewater surveillance. *Water Research*, 117516. [online]
- 445 <https://doi.org/10.1016/j.watres.2021.117516>.
- 446 Brochu, P., Ducré-Robitaille, J. F., and Brodeur, J. (2006) Physiological daily inhalation rates for free-
- 447 living pregnant and lactating adolescents and women aged 11 to 55 years, using data from doubly
- 448 labeled water measurements for use in health risk assessment. *Human and Ecological Risk*
- 449 *Assessment*, **12**(4), 702–735.
- 450 CDC (2021) COVID-19 Scientific Brief: SARS-CoV-2 Transmission. Updated May 7, 2021.
- 451 Cheng, Y, Cheng, Yafang, Ma, N., Witt, C., Rapp, S., Wild, P. S., and Andreae, M. O. (2021) Face masks
- 452 effectively limit the probability of SARS-CoV-2 transmission. *Science*, **6296**(May), 1–11.
- 453 Chu, D. K., Akl, E. A., Duda, S., Solo, K., Yaacoub, S., Schünemann, H. J., El-harakeh, A., Bognanni, A.,
- 454 Lotfi, T., Loeb, M., Hajizadeh, A., Bak, A., Izcovich, A., Cuello-Garcia, C. A., Chen, C., Harris, D.
- 455 J., Borowiack, E., Chamseddine, F., Schünemann, F., Morgano, G. P., Muti Schünemann, G. E. U.,
- 456 Chen, G., Zhao, H., Neumann, I., Chan, J., Khabsa, J., Hneiny, L., Harrison, L., Smith, M., Rizk, N.,
- 457 Giorgi Rossi, P., AbiHanna, P., El-khoury, R., Stalteri, R., Baldeh, T., Piggott, T., Zhang, Y., Saad,
- 458 Z., Khamis, A., and Reinap, M. (2020) Physical distancing, face masks, and eye protection to prevent
- 459 person-to-person transmission of SARS-CoV-2 and COVID-19: a systematic review and meta-
- 460 analysis. *The Lancet*, **395**(10242), 1973–1987.
- 461 Cortellessa, G., Stabile, L., Arpino, F., Faleiros, D. E., van den Bos, W., Morawska, L., and Buonanno, G.
- 462 (2021) Close proximity risk assessment for SARS-CoV-2 infection. *Science of the Total Environment*,
- 463 **794**, 148749. [online] <https://doi.org/10.1016/j.scitotenv.2021.148749>.
- 464 Dada, A. C. and Gyawali, P. (2021) Quantitative microbial risk assessment (QMRA) of occupational
- 465 exposure to SARS-CoV-2 in wastewater treatment plants. *Science of the Total Environment*, **763**,
- 466 142989. [online] <https://doi.org/10.1016/j.scitotenv.2020.142989>.

- 467 Dancer, S. J., Li, Y., Hart, A., Tang, J. W., and Jones, D. L. (2021) What is the risk of acquiring SARS-  
468 CoV-2 from the use of public toilets? *Science of the Total Environment*, 148341. [online]  
469 <https://doi.org/10.1016/j.phrs.2020.104743>.
- 470 Denpetkul, T. and Phosri, A. (2021) Daily ambient temperature and mortality in Thailand : Estimated  
471 effects , attributable risks , and effect modifications by greenness. *Science of the Total Environment*,  
472 **791**, 148373. [online] <https://doi.org/10.1016/j.scitotenv.2021.148373>.
- 473 Ding, Z., Qian, H., Xu, B., Huang, Y., Miao, T., Yen, H., Xiao, S., Cui, L., Wu, X., Shao, W., Song, Y.,  
474 Sha, L., Zhou, L., Xu, Y., Zhu, B., and Li, Y. (2021) Toilets dominate environmental detection of  
475 severe acute respiratory syndrome coronavirus 2 in a hospital. *Science of the Total Environment*, **753**,  
476 141710. [online] <https://doi.org/10.1016/j.scitotenv.2020.141710>.
- 477 Duguid, J. P. (1946) The size and the duration of air-carriage of respiratory droplets and droplet-nuclei.  
478 *Journal of Hygiene*, **44**(6), 471–479.
- 479 Fabian, P., Brain, J., Houseman, E. A., Gern, J., and Milton, D. K. (2011) Origin of exhaled breath particles  
480 from healthy and human rhinovirus-infected subjects. *Journal of Aerosol Medicine and Pulmonary*  
481 *Drug Delivery*, **24**(3), 137–147.
- 482 Goyal, A., Reeves, D. B., Thakkar, N., Famulare, M., Cardozo-Ojeda, E. F., Mayer, B. T., and Schiffer, J.  
483 T. (2021) Slight reduction in SARS-CoV-2 exposure viral load due to masking results in a significant  
484 reduction in transmission with widespread implementation. *Scientific Reports*, **11**(1), 1–12. [online]  
485 <https://doi.org/10.1038/s41598-021-91338-5>.
- 486 Gwynne, S. M. V., Hunt, A. L. E., Thomas, J. R., Thompson, A. J. L., and Séguin, L. (2019) The toilet  
487 paper: Bathroom dwell time observations at an airport. *Journal of Building Engineering*, **24**(March),  
488 100751. [online] <https://doi.org/10.1016/j.jobe.2019.100751>.
- 489 Haas, C. N., Rose, J. B., and Gerba, C. P. (2014) *Quantitative microbial risk assessment*, Wiley.
- 490 Han, Z. Y., Weng, W. G., and Huang, Q. Y. (2013) Characterizations of particle size distribution of the  
491 droplets exhaled by sneeze. *Journal of the Royal Society Interface*, **10**(88).
- 492 Jones, D. L., Baluja, M. Q., Graham, D. W., Corbishley, A., McDonald, J. E., Malham, S. K., Hillary, L.

- 493 S., Connor, T. R., Gaze, W. H., Moura, I. B., Wilcox, M. H., and Farkas, K. (2020) Shedding of  
494 SARS-CoV-2 in feces and urine and its potential role in person-to-person transmission and the  
495 environment-based spread of COVID-19. *Science of the Total Environment*, **749**(July), 141364.  
496 [online] <https://doi.org/10.1016/j.scitotenv.2020.141364>.
- 497 Kongprajug, A., Chyerochana, N., Mongkolsuk, S., and Sirikanchana, K. (2020) Effect of quantitative  
498 polymerase chain reaction data analysis using sample amplification efficiency on microbial source  
499 tracking assay performance and source attribution. *Environmental Science & Technology*, **54**, 8232–  
500 8244.
- 501 Li, Y., Qian, H., Hang, J., Chen, X., Cheng, P., Ling, H., Wang, S., Liang, P., Li, J., Xiao, S., Wei, J., Liu,  
502 L., Cowling, B. J., and Kang, M. (2021) Probable airborne transmission of SARS-CoV-2 in a poorly  
503 ventilated restaurant. *Building and Environment*, **196**(March), 107788. [online]  
504 <https://doi.org/10.1016/j.buildenv.2021.107788>.
- 505 Loudon, R. G. and Roberts, R. M. (1967) Droplet expulsion from the respiratory tract. *American Review*  
506 *of Respiratory Disease*, **95**(3), 435–442.
- 507 Maestre, J. P., Jarma, D., Yu, C., Siegel, J., Horner, S., and Kinney, K. A. (2021) Distribution of SARS-  
508 CoV-2 RNA signal in a home with COVID-19 positive occupants. *Science of the Total Environment*,  
509 **778**, 146201. [online] <https://doi.org/10.1016/j.scitotenv.2021.146201>.
- 510 Ministry of Public Health (2016) *Standard construction plan and layout for public toilets*. Bureau of  
511 *Environmental Health*. Department of Health. Ministry of Public Health. Thailand.,
- 512 Morawska, L., Tang, J. W., Bahnfleth, W., Bluyssen, P. M., Boerstra, A., Buonanno, G., Cao, J., Dancer,  
513 S., Floto, A., Franchimon, F., Haworth, C., Hogeling, J., Isaxon, C., Jimenez, J. L., Kurnitski, J., Li,  
514 Y., Loomans, M., Marks, G., Marr, L. C., Mazzeo, L., Melikov, A. K., Miller, S., Milton, D. K.,  
515 Nazaroff, W., Nielsen, P. V., Noakes, C., Peccia, J., Querol, X., Sekhar, C., Seppänen, O., Tanabe, S.  
516 ichi, Tellier, R., Tham, K. W., Wargoeki, P., Wierzbicka, A., and Yao, M. (2020) How can airborne  
517 transmission of COVID-19 indoors be minimised? *Environment International*, **142**(April).
- 518 Murakami, M., Miura, F., Kitajima, M., Fujii, K., Yasutaka, T., Iwasaki, Y., Ono, K., Shimazu, Y., Sorano,

- 519 S., Okuda, T., Ozaki, A., Katayama, K., Nishikawa, Y., Kobashi, Y., Sawano, T., Abe, T., Saito, M.  
520 M., Tsubokura, M., Naito, W., and Imoto, S. (2021) COVID-19 risk assessment at the opening  
521 ceremony of the Tokyo 2020 Olympic Games. *Microbial Risk Analysis*, (November 2020), 100162.  
522 [online] <https://doi.org/10.1016/j.mran.2021.100162>.
- 523 Pitol, A. K. and Julian, T. R. (2021) Community Transmission of SARS-CoV-2 by Surfaces: Risks and  
524 Risk Reduction Strategies. *Environmental Science and Technology Letters*, **8**(3), 263–269.
- 525 Rose, J. B. and Gerba, C. P. (1991) Use of risk assessment for development of microbial standards. *Water*  
526 *Science and Technology*, **24**(2), 29–34.
- 527 Schijven, J., Vermeulen, L. C., Swart, A., Meijer, A., Duizer, E., and de Roda Husman, A. M. (2021)  
528 Quantitative microbial risk assessment for airborne transmission of sars-cov-2 via breathing,  
529 speaking, singing, coughing, and sneezing. *Environmental Health Perspectives*, **129**(4), 1–10.
- 530 Schuit, M., Ratnesar-Shumate, S., Yolitz, J., Williams, G., Weaver, W., Green, B., Miller, D., Krause, M.,  
531 Beck, K., Wood, S., Holland, B., Bohannon, J., Freeburger, D., Hooper, I., Biryukov, J., Altamura, L.  
532 A., Wahl, V., Hevey, M., and Dabisch, P. (2020) Airborne SARS-CoV-2 is rapidly inactivated by  
533 simulated sunlight. *Journal of Infectious Diseases*, **222**(4), 564–571.
- 534 Sherchan, S. P., Shahin, S., Ward, L. M., Tandukar, S., Aw, T. G., Schmitz, B., Ahmed, W., and Kitajima,  
535 M. (2020) First detection of SARS-CoV-2 RNA in wastewater in North America: A study in  
536 Louisiana, USA. *Science of the Total Environment*, **743**, 140621. [online]  
537 <https://doi.org/10.1016/j.scitotenv.2020.140621>.
- 538 Shi, K. W., Huang, Y. H., Quon, H., Ou-Yang, Z. L., Wang, C., and Jiang, S. C. (2021) Quantifying the  
539 risk of indoor drainage system in multi-unit apartment building as a transmission route of SARS-CoV-  
540 2. *Science of the Total Environment*, **762**, 143056. [online]  
541 <https://doi.org/10.1016/j.scitotenv.2020.143056>.
- 542 Stabile, L., Pacitto, A., Mikszewski, A., Morawska, L., and Buonanno, G. (2021) Ventilation procedures to  
543 minimize the airborne transmission of viruses in classrooms. *Building and Environment*, **202**(March),  
544 108042. [online] <https://doi.org/10.1016/j.buildenv.2021.108042>.



- 545 Wang, Z., Yang, B., Li, Q., Wen, L., and Zhang, R. (2020) Clinical features of 69 cases with coronavirus  
546 disease 2019 in Wuhan, China. *Clinical Infectious Diseases*, **71**(15), 769–777.
- 547 Watanabe, T., Bartrand, T. A., Weir, M. H., Omura, T., and Haas, C. N. (2010) Development of a dose-  
548 response model for SARS coronavirus. *Risk Analysis: An International Journal*, **30**(7), 1129–1138.
- 549 Whiley, H., Keerthirathne, T. P., Nisar, M. A., White, M. A. F., and Ross, K. E. (2020) Viral filtration  
550 efficiency of fabric masks compared with surgical and n95 masks. *Pathogens*, **9**(9), 1–8.
- 551 WHO (2020a) Considerations for public health and social measures in the workplace in the context of  
552 COVID-19. World Health Organisation, (May), 1. [online] [https://www.who.int/publications-](https://www.who.int/publications-detail/risk-)  
553 [detail/risk-](https://www.who.int/publications-detail/risk-) (Accessed August 7, 2021).
- 554 WHO (2020b) Coronavirus disease (COVID-19) advice for the public: When and how to use masks. ,  
555 (December 2020). [online] [https://www.who.int/emergencies/diseases/novel-coronavirus-](https://www.who.int/emergencies/diseases/novel-coronavirus-2019/advice-for-public/when-and-how-to-use-masks)  
556 [2019/advice-for-public/when-and-how-to-use-masks](https://www.who.int/emergencies/diseases/novel-coronavirus-2019/advice-for-public/when-and-how-to-use-masks) (Accessed August 8, 2021).
- 557 WHO (2021) *Roadmap to improve and ensure good indoor ventilation in the context of COVID-19* (World  
558 Health Organization, ed.), World Health Organization.
- 559 Wölfel, R., Corman, V. M., Guggemos, W., Seilmaier, M., Zange, S., Müller, M. A., Niemeyer, D., Jones,  
560 T. C., Vollmar, P., Rothe, C., Hoelscher, M., Bleicker, T., Brünink, S., Schneider, J., Ehmann, R.,  
561 Zwirgmaier, K., Drosten, C., and Wendtner, C. (2020) Virological assessment of hospitalized patients  
562 with COVID-2019. *Nature*, **581**(7809), 465–469.
- 563 Xiao, F., Sun, J., Xu, Y., Li, F., Huang, X., Li, H., Zhao, Jingxian, Huang, J., and Zhao, Jincun (2020)  
564 Infectious SARS-CoV-2 in feces of patient with severe COVID-19. *Emerging Infectious Diseases*,  
565 **26**(8), 1920–1922.
- 566 Zaneti, R. N., Girardi, V., Spilki, F. R., Mena, K., Westphalen, A. P. C., da Costa Colares, E. R., Pozzebon,  
567 A. G., and Etchepare, R. G. (2021) Quantitative microbial risk assessment of SARS-CoV-2 for  
568 workers in wastewater treatment plants. *Science of the Total Environment*, **754**, 142163. [online]  
569 <https://doi.org/10.1016/j.scitotenv.2020.142163>.
- 570 Zang, R., Castro, M. F. G., McCune, B. T., Zeng, Q., Rothlauf, P. W., Sonnek, N. M., Liu, Z., Brulois, K.

571 F., Wang, X., Greenberg, H. B., Diamond, M. S., Ciorba, M. A., Whelan, S. P. J., and Ding, S. (2020)  
572 TMPRSS2 and TMPRSS4 promote SARS-CoV-2 infection of human small intestinal enterocytes.  
573 Science Immunology, **5**(47), 1–14.

574 Zhang, X., Ji, Z., Yue, Y., Liu, H., and Wang, J. (2021) Infection Risk Assessment of COVID-19 through  
575 Aerosol Transmission: A Case Study of South China Seafood Market. Environmental Science and  
576 Technology, **55**(7), 4123–4133.

577

## 578 **Figure legends**

579 **Figure 1.** Outline of the QMRA steps for the scenarios associated with SARS-CoV-2 respiratory  
580 transmission in a public toilet setting

581 **Figure 2.** Risk of infection per event for a male (M) or female (F) receptor in three virus-generating  
582 scenarios: an infector breathing (Br), breathing with a cough (Br+Co), and breathing with a sneeze  
583 (Br+Sn). The forest plots show the mean values in solid circles and 95% confidence intervals  
584 (ranging from the 2.5th [left whiskers] to the 97.5th [right whiskers] percentiles). The dashed line  
585 indicates the  $5 \times 10^{-5}$  benchmark value.

586 **Figure 3.** Risk of infection per event among male (M) and female (F) receptors in the scenario  
587 with an infector (I) breathing with a sneeze (Br+Sn) when (a) only the infector wore different types  
588 of masks and (b) only the receptor (R) wore different types of masks. The forest plots show the  
589 mean values in solid circles and 95% confidence intervals (ranging from the 2.5th [left whiskers]  
590 to the 97.5th [right whiskers] percentiles). The dashed line indicates the  $5 \times 10^{-5}$  benchmark value.

591 **Figure 4.** The risk of infection per event in a scenario with an infector (I) breathing with a sneeze  
592 (Br+Sn) when both the infector and receptor (R) wore different types of masks. The risks to a  
593 female receptor are represented because no gender effect was evident. The forest plots show the

594 mean values in solid circles and 95% confidence intervals (ranging from the 2.5th [left whiskers]  
595 to the 97.5th [right whiskers] percentiles). The dashed line indicates the  $5 \times 10^{-5}$  benchmark value.

596 **Figure 5.** The risk of infection per event in a scenario with an infector breathing with a sneeze  
597 (Br+Sn) with 0, 0.5, 10, 12, and 20 air changes per hour (ACH). The risks to a female receptor are  
598 represented because no gender effect was evident. The forest plots show the mean values in solid  
599 circles and 95% confidence intervals (ranging from the 2.5th [left whiskers] to the 97.5th [right  
600 whiskers] percentiles). The dashed line indicates the  $5 \times 10^{-5}$  benchmark value.

601 **Figure 6.** The risk of infection per event in a scenario with an infector (I) breathing with a sneeze  
602 (Br+Sn) when the infector wore different types of masks, the receptor (R) wore different types of  
603 masks, and the air change per hour was (a) 10 ACH, (b) 12 ACH, and (c) 20 ACH. The risks to a  
604 female receptor are represented because no gender effect was evident. The forest plots show the  
605 mean values in solid circles and 95% confidence intervals (ranging from the 2.5th [left whiskers]  
606 to the 97.5th [right whiskers] percentiles). The dashed line indicates the  $5 \times 10^{-5}$  benchmark value.

607 **Figure 7.** The sensitivity analysis representing the contribution of input variables to the risk of  
608 infection per event for male and female receptors in three transmission scenarios, namely, with the  
609 infector breathing (Br), breathing with a cough (Br+Co), and breathing with a sneeze (Br+Sn): (a)  
610 infector's Br to a female receptor, (b) infector's Br to a male receptor, (c) infector's Br+Co to a  
611 female receptor, (d) infector's Br+Co to a male receptor, (e) infector's Br+Sn to a female receptor,  
612 and (f) infector's Br+Sn to a male receptor.

613

614

615

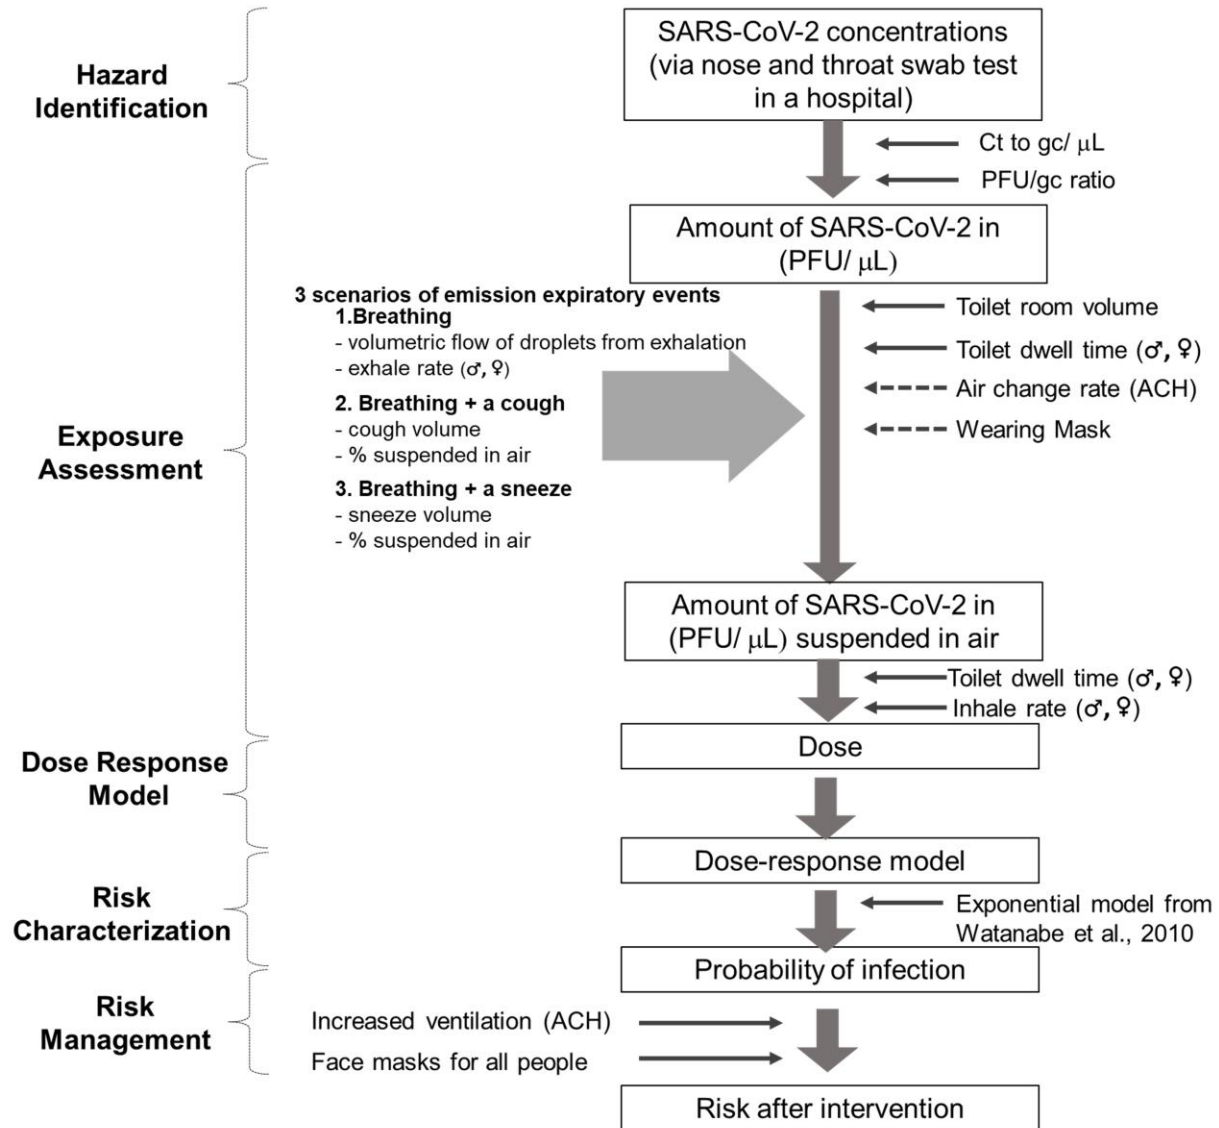

616

617 **Figure 1.** Outline of the QMRA steps for the scenarios associated with SARS-CoV-2 respiratory  
 618 transmission in a public toilet setting

619

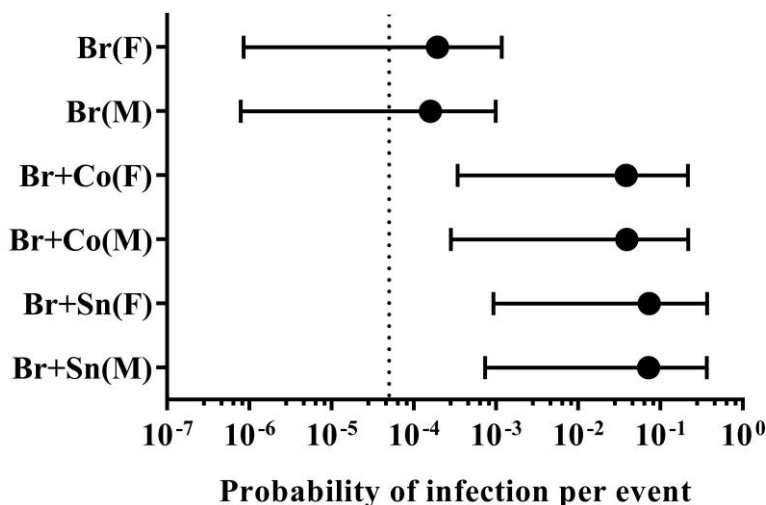

620

621 **Figure 2.** Risk of infection per event for a male (M) or female (F) receptor in three virus-generating  
 622 scenarios: an infector breathing (Br), breathing with a cough (Br+Co), and breathing with a sneeze  
 623 (Br+Sn). The forest plots show the mean values in solid circles and 95% confidence intervals  
 624 (ranging from the 2.5th [left whiskers] to the 97.5th [right whiskers] percentiles). The dashed line  
 625 indicates the  $5 \times 10^{-5}$  benchmark value.

626

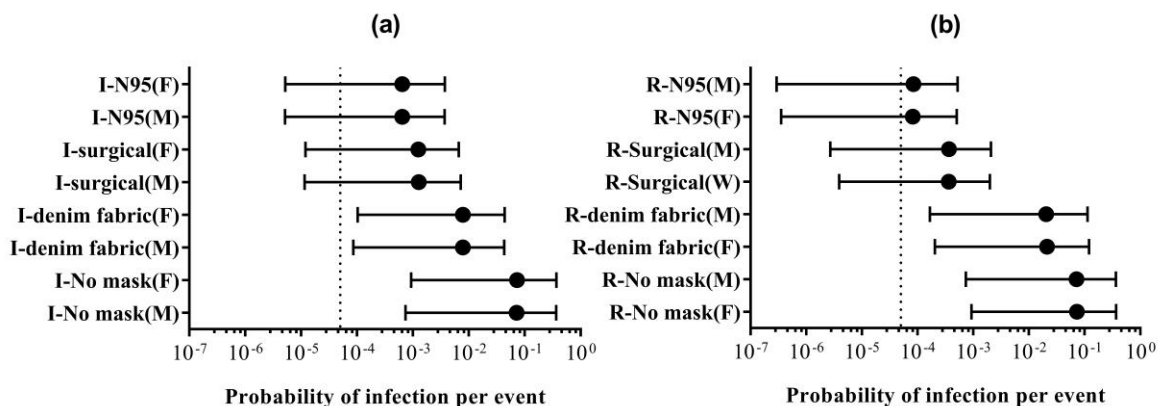

627

628 **Figure 3.** Risk of infection per event among male (M) and female (F) receptors in the scenario  
 629 with an infector (I) breathing with a sneeze (Br+Sn) when (a) only the infector wore different types  
 630 of masks and (b) only the receptor (R) wore different types of masks. The forest plots show the  
 631 mean values in solid circles and 95% confidence intervals (ranging from the 2.5th [left whiskers]  
 632 to the 97.5th [right whiskers] percentiles). The dashed line indicates the  $5 \times 10^{-5}$  benchmark value.

633

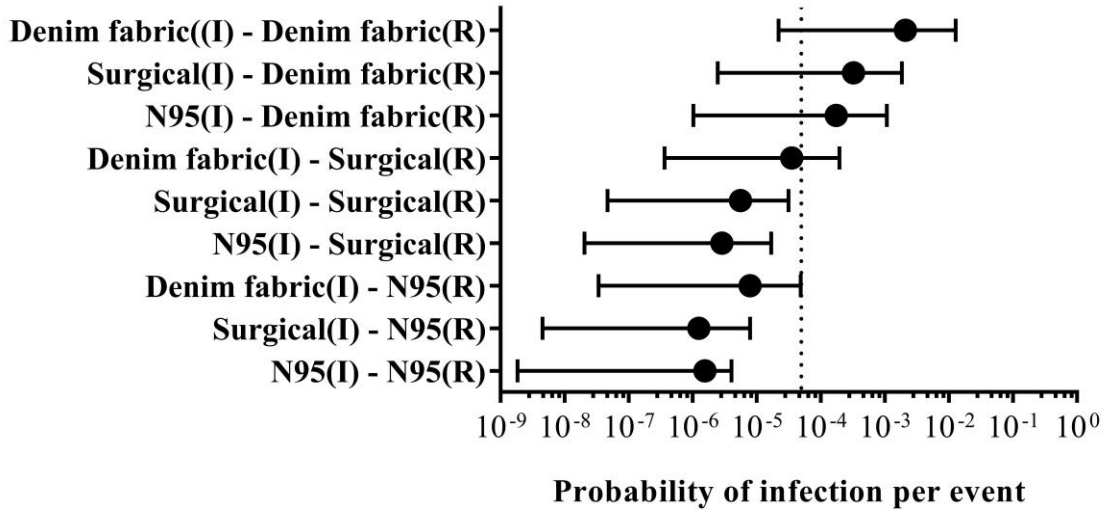

634  
 635 **Figure 4.** The risk of infection per event in a scenario with an infector (I) breathing with a sneeze  
 636 (Br+Sn) when both the infector and receptor (R) wore different types of masks. The risks to a  
 637 female receptor are represented because no gender effect was evident. The forest plots show the  
 638 mean values in solid circles and 95% confidence intervals (ranging from the 2.5th [left whiskers]  
 639 to the 97.5th [right whiskers] percentiles). The dashed line indicates the  $5 \times 10^{-5}$  benchmark value.  
 640  
 641

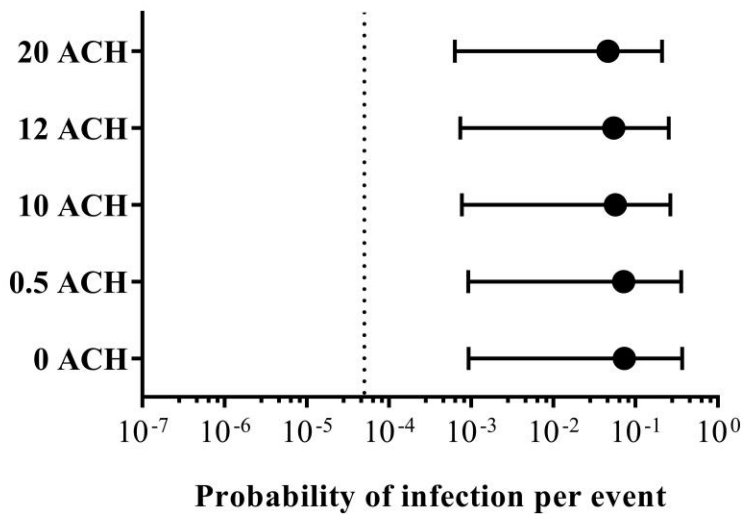

642  
 643 **Figure 5.** The risk of infection per event in a scenario with an infector breathing with a sneeze  
 644 (Br+Sn) with 0, 0.5, 10, 12, and 20 air changes per hour (ACH). The risks to a female receptor are  
 645 represented because no gender effect was evident. The forest plots show the mean values in solid  
 646 circles and 95% confidence intervals (ranging from the 2.5th [left whiskers] to the 97.5th [right  
 647 whiskers] percentiles). The dashed line indicates the  $5 \times 10^{-5}$  benchmark value.  
 648

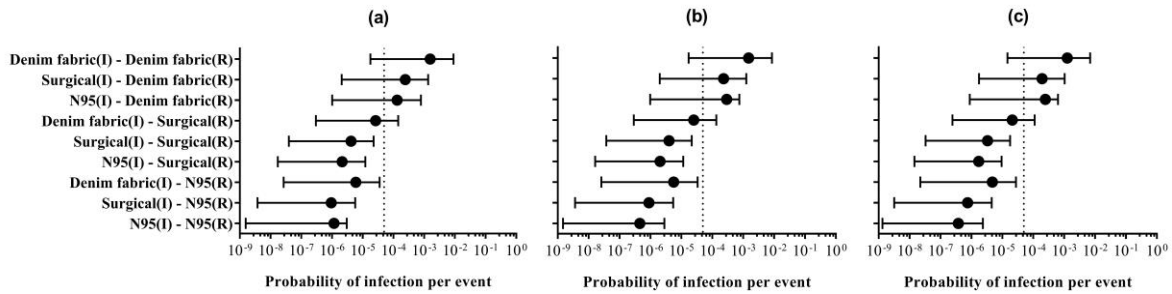

649

650 **Figure 6.** The risk of infection per event in a scenario with an infector (I) breathing with a sneeze  
651 (Br+Sn) when the infector wore different types of masks, the receptor (R) wore different types of  
652 masks, and the air change per hour was (a) 10 ACH, (b) 12 ACH, and (c) 20 ACH. The risks to a  
653 female receptor are represented because no gender effect was evident. The forest plots show the  
654 mean values in solid circles and 95% confidence intervals (ranging from the 2.5th [left whiskers]  
655 to the 97.5th [right whiskers] percentiles). The dashed line indicates the  $5 \times 10^{-5}$  benchmark value.

656

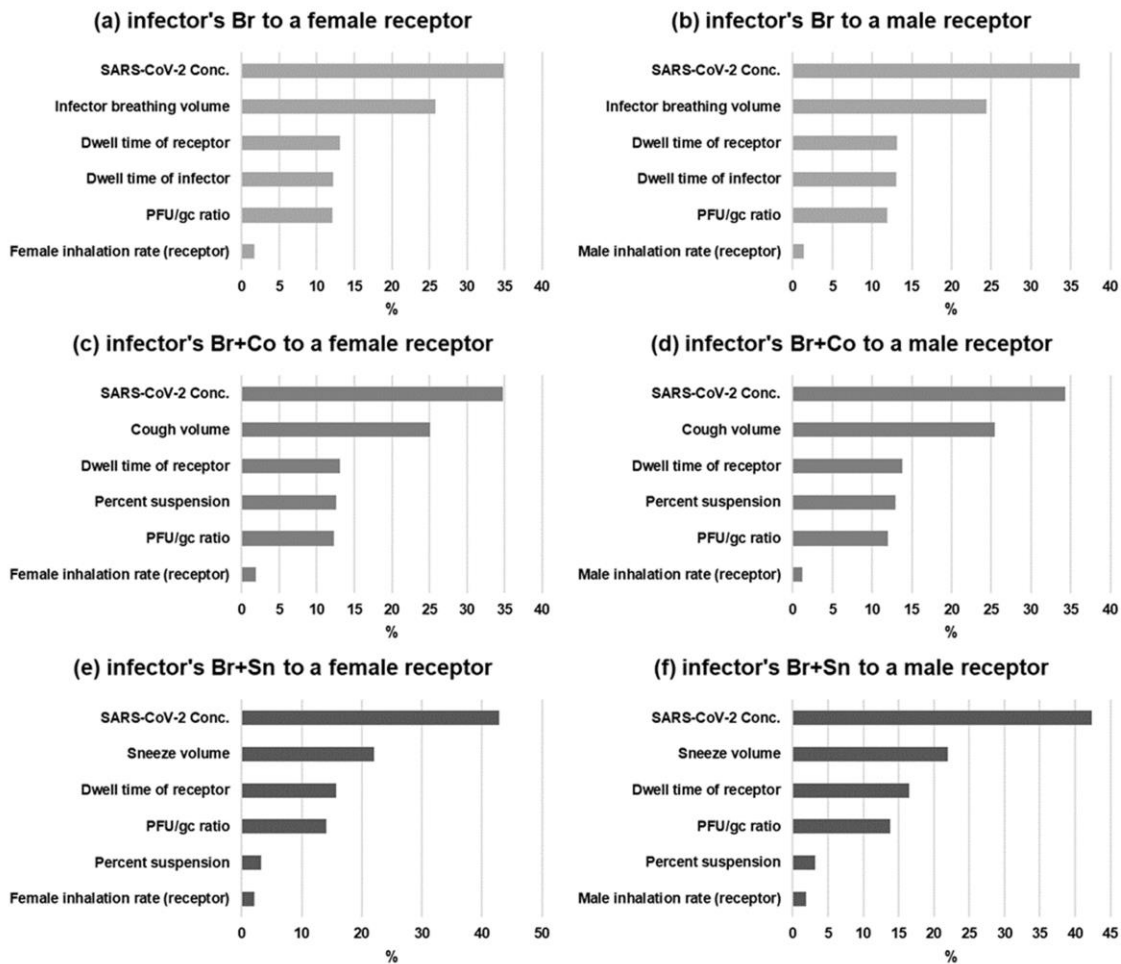

657

658 **Figure 7.** The sensitivity analysis representing the contribution of input variables to the risk of  
 659 infection per event for male and female receptors in three transmission scenarios, namely, with the  
 660 infector breathing (Br), breathing with a cough (Br+Co), and breathing with a sneeze (Br+Sn): (a)  
 661 infector's Br to a female receptor, (b) infector's Br to a male receptor, (c) infector's Br+Co to a  
 662 female receptor, (d) infector's Br+Co to a male receptor, (e) infector's Br+Sn to a female receptor,  
 663 and (f) infector's Br+Sn to a male receptor.
